# Supplementary material for: Predictive imaging biomarkers on Whole-Body Diffusion Weighted MRI (WB-DWMRI) and 68 Ga-PSMA-PET/CT for 177 Lu-PSMA-Therapy in metastatic prostate cancer (mPC)
Source: Research Square preprint supplement (doi:10.21203/rs.3.rs-8564323/v1), 2026-01-20
Supplement: Supplementary file 1 [file b42e65d586c5294b62a6701c.docx]

# Supplementary Material

Table S1: Effect of baseline predictors on odds of lesion-response in random effect logistic regression coefficients

|  | **Model 1** | | **Model 2** | | **Model 3** | | **Model 4** | | **Model 5** | |
| --- | --- | --- | --- | --- | --- | --- | --- | --- | --- | --- |
|  | **OR** | **95% CI** | **OR** | **95% CI** | **OR** | **95% CI** | **OR** | **95% CI** | **OR** | **95% CI** |
| Bone lesion | 1.00 | (reference) | 1.00 | (reference) | 1.00 | (reference) | 1.00 | (reference) | 1.00 | (reference) |
| Lymph node lesion | 0.97 | 0.15, 6.37 | 2.25 | 0.18, 28.0 | 1.49 | 0.15, 14.74 | 3.60 | 0.27, 48.5 | 3.63 | 0.20, 65.3 |
| SUVmean [1] (bone lesions) |  |  | 1.50 | 1.10, 2.04 |  |  |  |  | 1.47 | 1.08, 2.01 |
| SUVmean [1] (lymph node lesions) |  |  | 1.18 | 0.97, 1.43 |  |  |  |  | 1.14 | 0.90, 1.45 |
| ADCmean [2] (bone lesions) |  |  |  |  | 1.17 | 0.83, 1.63 |  |  |  |  |
| ADCmean [2] (lymph node lesions) |  |  |  |  | 0.66 | 0.39, 1.12 |  |  |  |  |
| log10(ADCvol)[3] (bone lesions) |  |  |  |  |  |  | 4.26 | 0.68, 26.8 | 2.58 | 0.35, 19.2 |
| log10(ADCvol) [3] (lymph node lesions) |  |  |  |  |  |  | 6.23 | 0.58, 67.0 | 1.95 | 0.09, 42.2 |
|  | 2.04 | 1.04, 3.99 | 2.36 | 1.13, 4.93 | 2.60 | 1.24, 5.43 | 2.24 | 1.07, 4.71 | 2.36 | 1.10, 5.09 |
| Likelihood ratio test p-value (compared to model 1) |  |  | <0.001 |  | 0.124 |  | 0.060 |  | 0.002 |  |
| AIC | 112.8 |  | 96.8 |  | 108.6 |  | 107.2 |  | 95.7 |  |

**Notes**: [1] centred on 15; [2] centred on 900 then divided by 100; [3] centred on 0.4;: standard deviation of patient-level random effect (on log odds scale). AIC: Akaike Information Criterion.

Table *S2: Number and percentage of patients who had mixed responses in their 5 hottest lesions*

| Response type | Number of patients, N (%) | PSA response, N (%) | Radiologist reported response, N (%) |
| --- | --- | --- | --- |
| Mixed: stable + response | 7/20 (35%) | Response:3 (43%)  Progression:4 (57%) | Progression: 4 (57%)  Response: 3 (43%)  Stable/Mixed: 0 |
| Mixed: stable + progression | 3/20 (15%) | Response:1 (33%)  Progression:2 (66%) | Progression: 3 (100%)  Response:0  Stable/Mixed: 0 |
| Mixed: response + progression | 3/20 (15%) | Response:1 (33%)  Progression:2 (66%) | Progression: 2 (66%)  Response:0  Stable/Mixed: 1 (33%) |
| Only response | 7/20 (35%) | Response:6 (86%)  Progression:1 (14%) | Progression: 0  Response: 6 (86%)  Stable/Mixed: 1 (14%) |
| Only progression | 0/20 (0%) | N/A | N/A |
